# Supplementary material for: TRIM28 protects TRIM24 from SPOP-mediated degradation and promotes prostate cancer progression
Source: PubMed Central journal article supplement (PMC6258673; doi:10.1038/s41467-018-07475-5), 2018-11-27
Supplement: 41467_2018_7475_MOESM1_ESM.pdf [file 41467_2018_7475_MOESM1_ESM.pdf]

## SUPPLEMENTARY INFORMATION

TRIM28 protects TRIM24 from SPOP-mediated degradation and promotes prostate cancer progression

Ka-wing Fong et al.

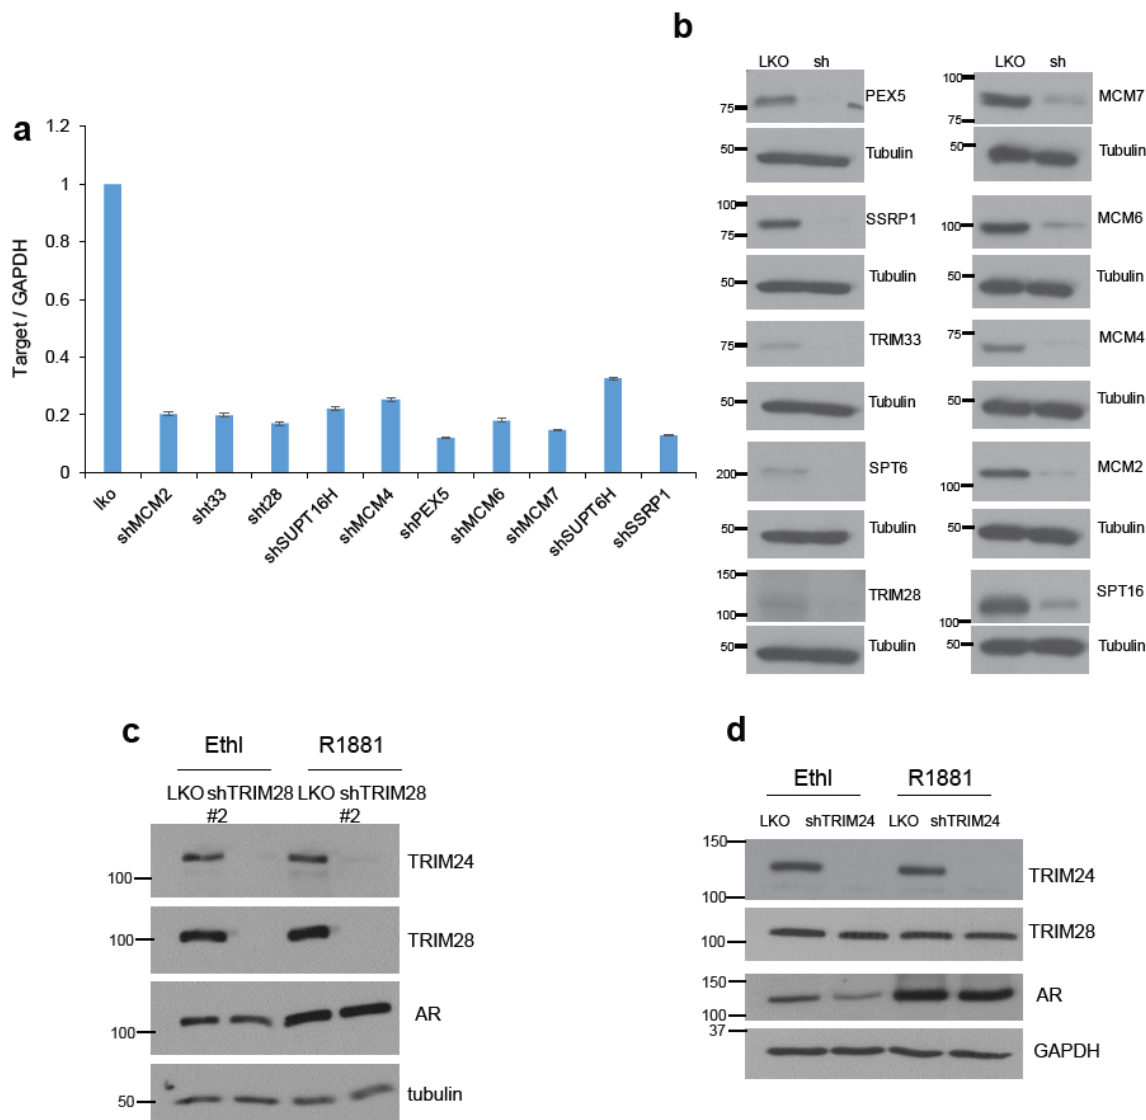

**Supplementary Figure 1 (related to Figure 1). Systematic screening of TRIM24-interactors identifies TRIM28 as a positive regulator of TRIM24 protein stability.**

**(a)** RNA were extracted from LNCaP cells infected with indicated shRNAs. QRT-PCR analysis was performed using corresponding primer sets and normalized to GAPDH. Data shown is mean ( $\pm$ SEM,  $n=3$ ).

**(b)** Protein lysates were harvested from LNCaP cells infected with indicated shRNAs. Immunoblotting was performed using antibodies corresponding to each protein.

**(c)** TRIM28 stabilizes TRIM24 protein in LNCaP cells. LNCaP cells expressing shCtrl or a second shRNA against TRIM28 were hormone starved for 3 days and treated with ethanol or 1nM R1881 for 48h. Protein lysates were harvested and subjected to immunoblotting analysis.

**(d)** TRIM24 is not required for TRIM28 protein stability. LNCaP cells infected with lentiviral supernatant containing LKO and shTRIM24, respectively for 4 days. Protein lysates were then harvested and subjected to immunoblotting.

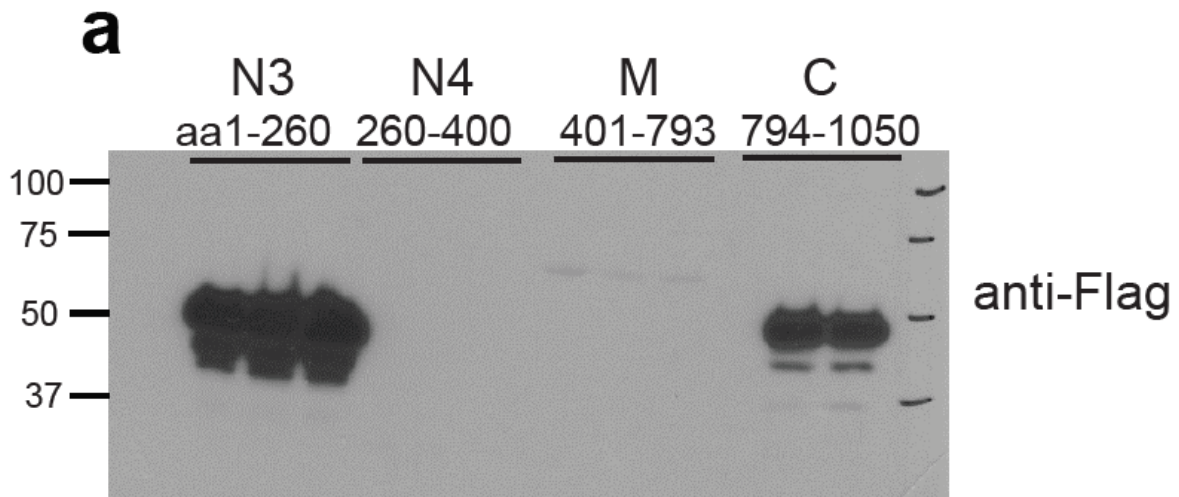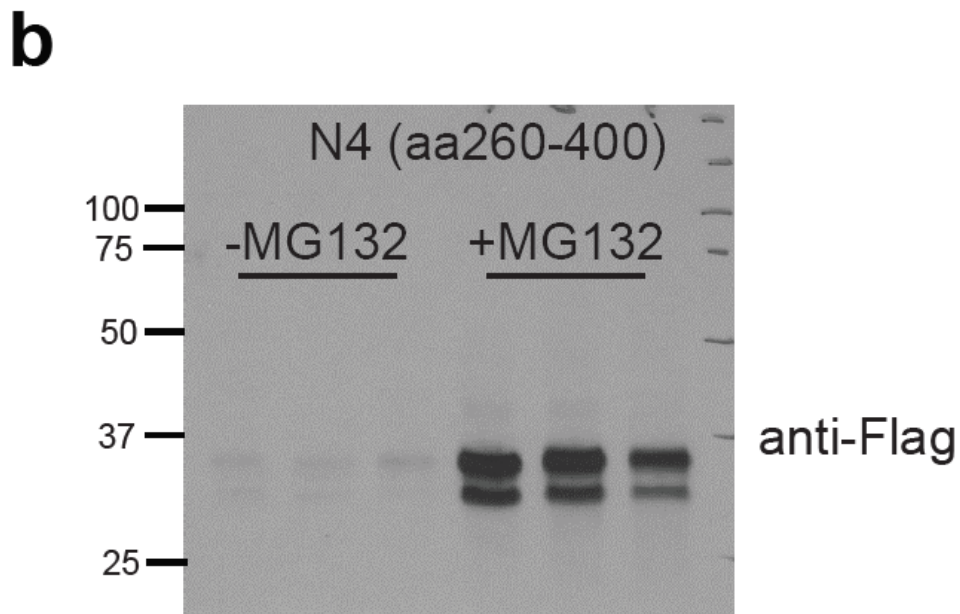

**Supplementary Figure 2 (related to Figure 2). Some N-terminal TRIM24 deletion constructs were degraded by proteasome-mediated degradation.**

(a) Various TRIM24 fragments with an SFB tag were transiently expressed in HEK293T cells. Protein lysates were collected and western blot was performed to detect Flag-tag protein.

(b) TRIM24 fragments were regulated by proteasome degradation. TRIM24 N4 (aa260-400) was expressed in HEK293T and treated with DMSO or 10 $\mu$ M MG132 for 8hrs. Immunoblot was performed to detect Flag-tag proteins in protein lysates.

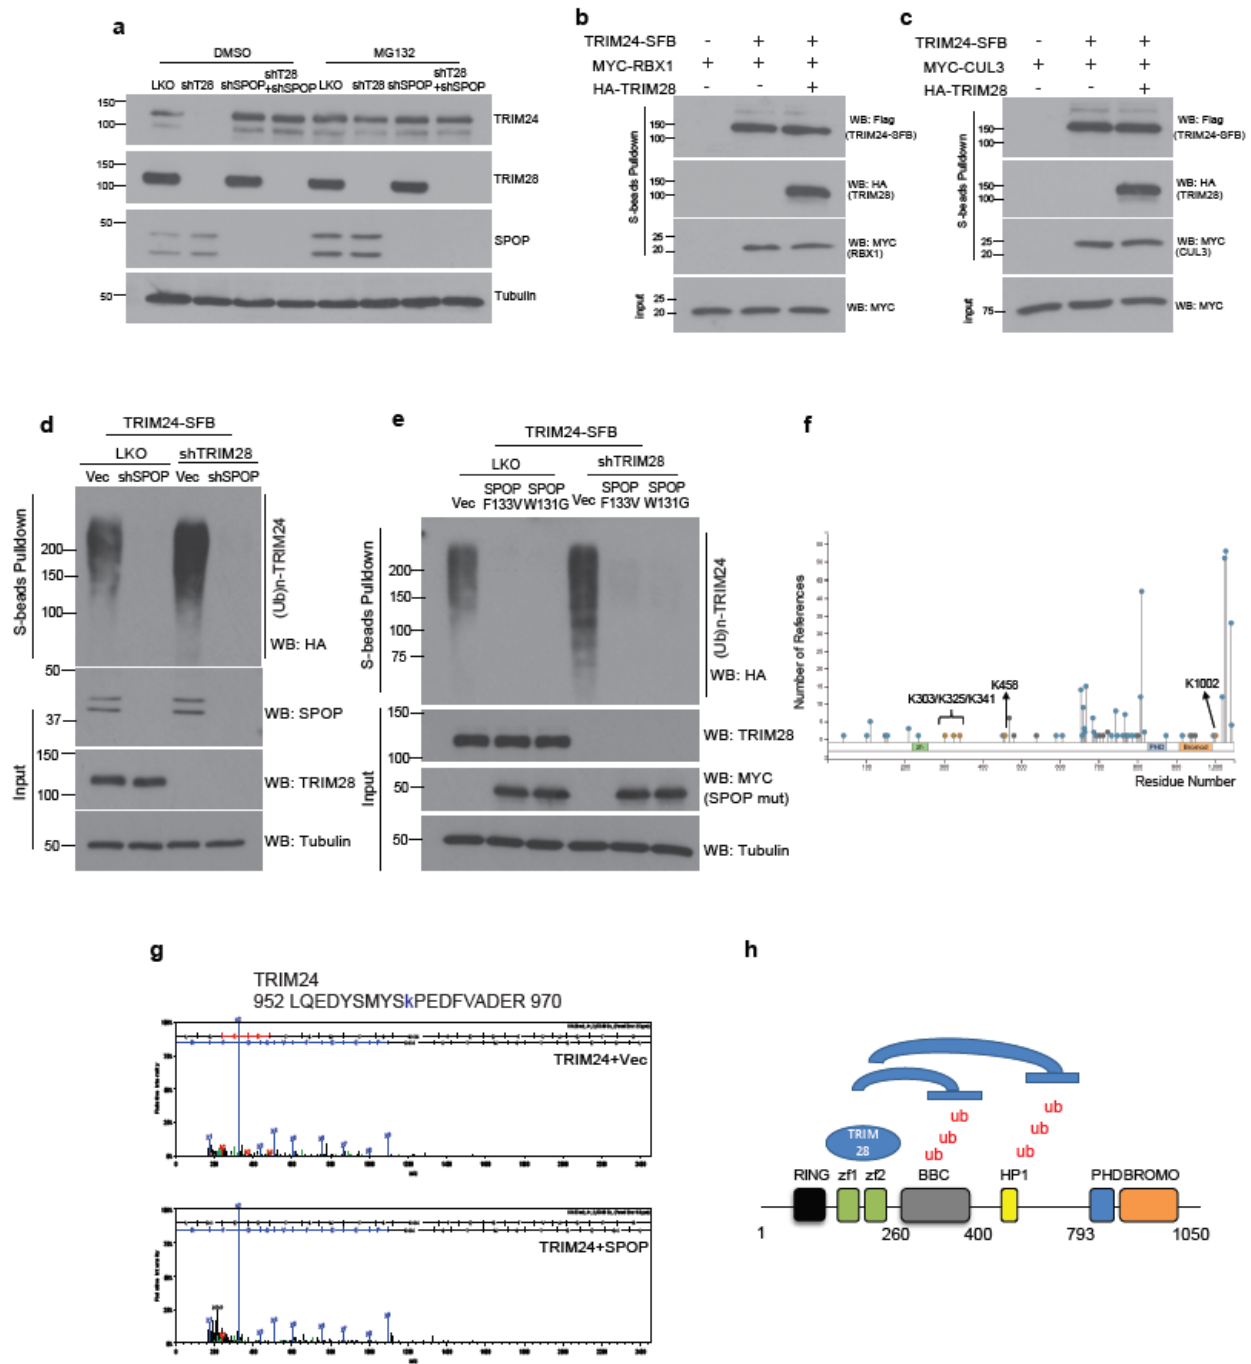

**Supplementary 3 (related to Figure 3). TRIM28 inhibits SPOP-mediated ubiquitination and degradation of TRIM24.**

(a) TRIM28 protects TRIM24 from SPOP-driven proteasome-mediated degradation. LNCaP cells expressing shCtrl, shTRIM28, shSPOP or shTRIM28+shSPOP were treated with DMSO or 10uM MG132 for 8 hrs and protein lysates were subjected to western blot analysis using indicated antibodies.

**(b-c)** TRIM28 does not affect RBX1 or CUL3 binding to TRIM24. HEK293T cells co-transfected with TRIM24-SFB and empty vector, Myc-RBX1 **(b)** or Myc-CUL3 **(c)** and HA-TRIM28 were treated with 20uM MG132 for 24 hrs and then harvested. S-beads were used to pull down TRIM24-SFB from cell extract, bound proteins were analyzed by immunoblotting using indicated antibodies.

**(d)** TRIM28 knockdown promotes SPOP-mediated ubiquitination of TRIM24. S-beads pull down was performed using protein extracts of MG132-treated LNCaP cells expressing TRIM24-SFB and HA-Ub were infected with pLKO, shSPOP, shTRIM28 or shTRIM28+shSPOP. The enriched protein complexes were analyzed by immunoblotting.

**(e)** SPOP mutants abolishes TRIM24 ubiquitination. LNCaP cells were transfected with TRIM24-SFB, HA-Ub, and Myc-SPOP F133V or SPOP-W131G in control or TRIM28-depleted condition. After 4hrs of 20uM MG132 treatment, cells were harvested and cell lysates were subjected to S-beads pull down followed by immunoblotting.

**(f)** Identification of potential TRIM24 ubiquitination sites. TRIM24 protein post-translational modification was profiled by PhosphoSitePlus ([www.phosphosite.org](http://www.phosphosite.org)).

**(g)** Protein ubiquitination analysis by mass spectrometry. TRIM24-SFB were co-transfected with vector or SPOP. Flag-IP proteins were analyzed by mass spectrometry and scanned for ubiquitination sites. Ubiquitinated K961 is highlighted in blue color.

**(h)** TRIM28 binds to TRIM24 protein to protect it from ubiquitination by wildtype SPOP.

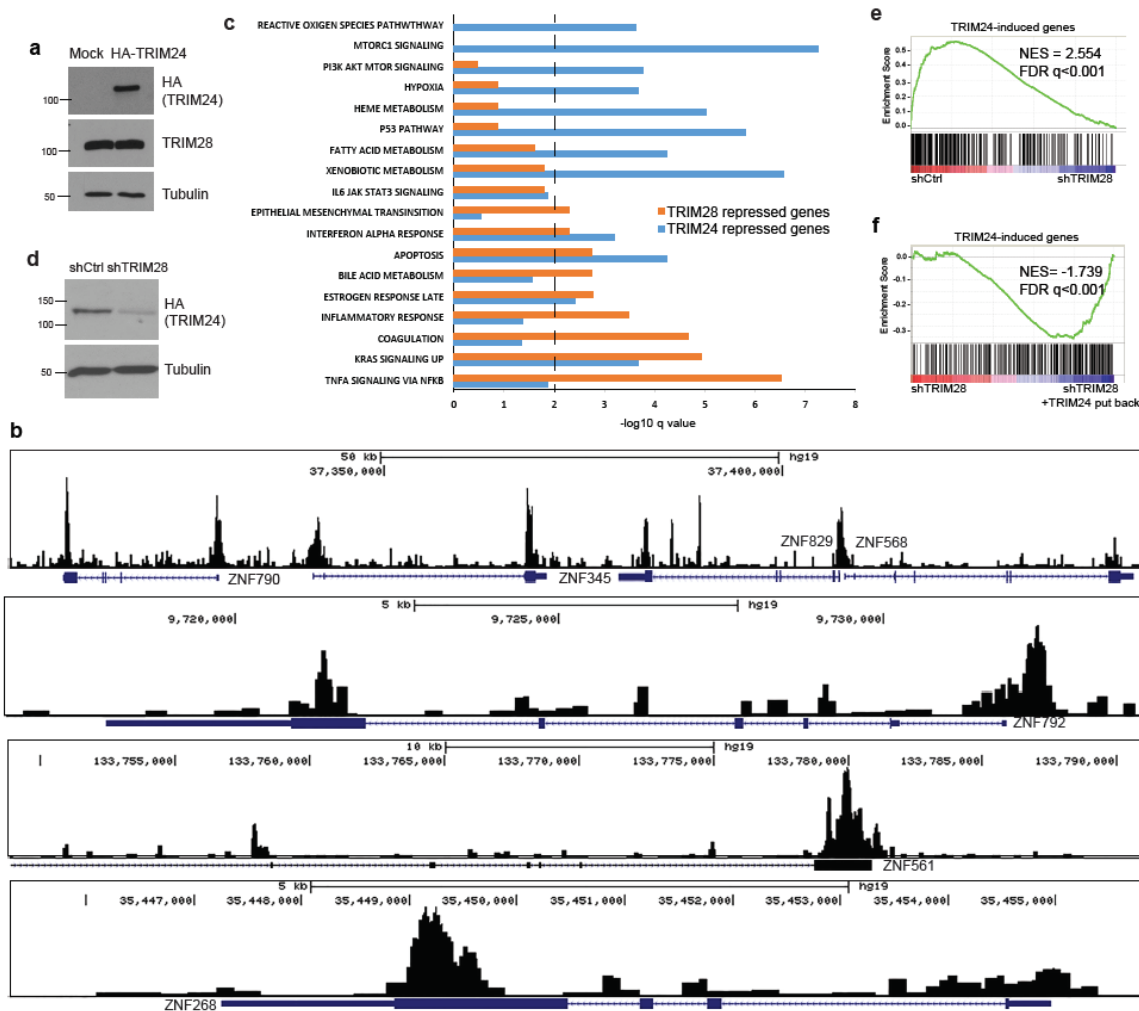

**Supplementary Figure 4 (related to Figure 4). TRIM28 co-occupies with TRIM24 on the chromatin to co-regulate many TRIM24 target genes.**

(a) Protein lysates were collected from LNCaP cells with stable HA-TRIM24 expression and anti-HA antibody was used to confirm expression of HA-TRIM24 protein.

(b) TRIM28 ChIP-Seq in LNCaP cells. Genome browser tracks depicts TRIM28 occupancy at the promoters and 3' coding exons of zinc finger (ZNF) genes.

(c) HALLMARK gene sets enriched by TRIM28- or TRIM24-repressed genes. TRIM24- or TRIM28-repressed genes were determined by microarray profiling of LNCaP cells expressing pLKO, shTRIM24 or shTRIM28 in the presence of R1881 and subsequently subjected to GSEA analysis of HALLMARK gene sets. The GO-enrichment p values are indicated at the x-axis.

(d) TRIM28 stabilizes HA-TRIM24 protein. LNCaP cells stably expressing HA-TRIM24 were infected with control shRNA or shRNA against TRIM28. Protein lysates were collected and subjected to western blotting analysis.

(e-f) TRIM28 regulates TRIM24-mediated gene expression program. GSEA was performed to determine the enrichment of TRIM24-induced gene sets in expression dataset profiling LNCaP with control or TRIM28 knockdown (e), or with TRIM28 knockdown or TRIM28 knockdown and TRIM24-SFB re-expression (f).

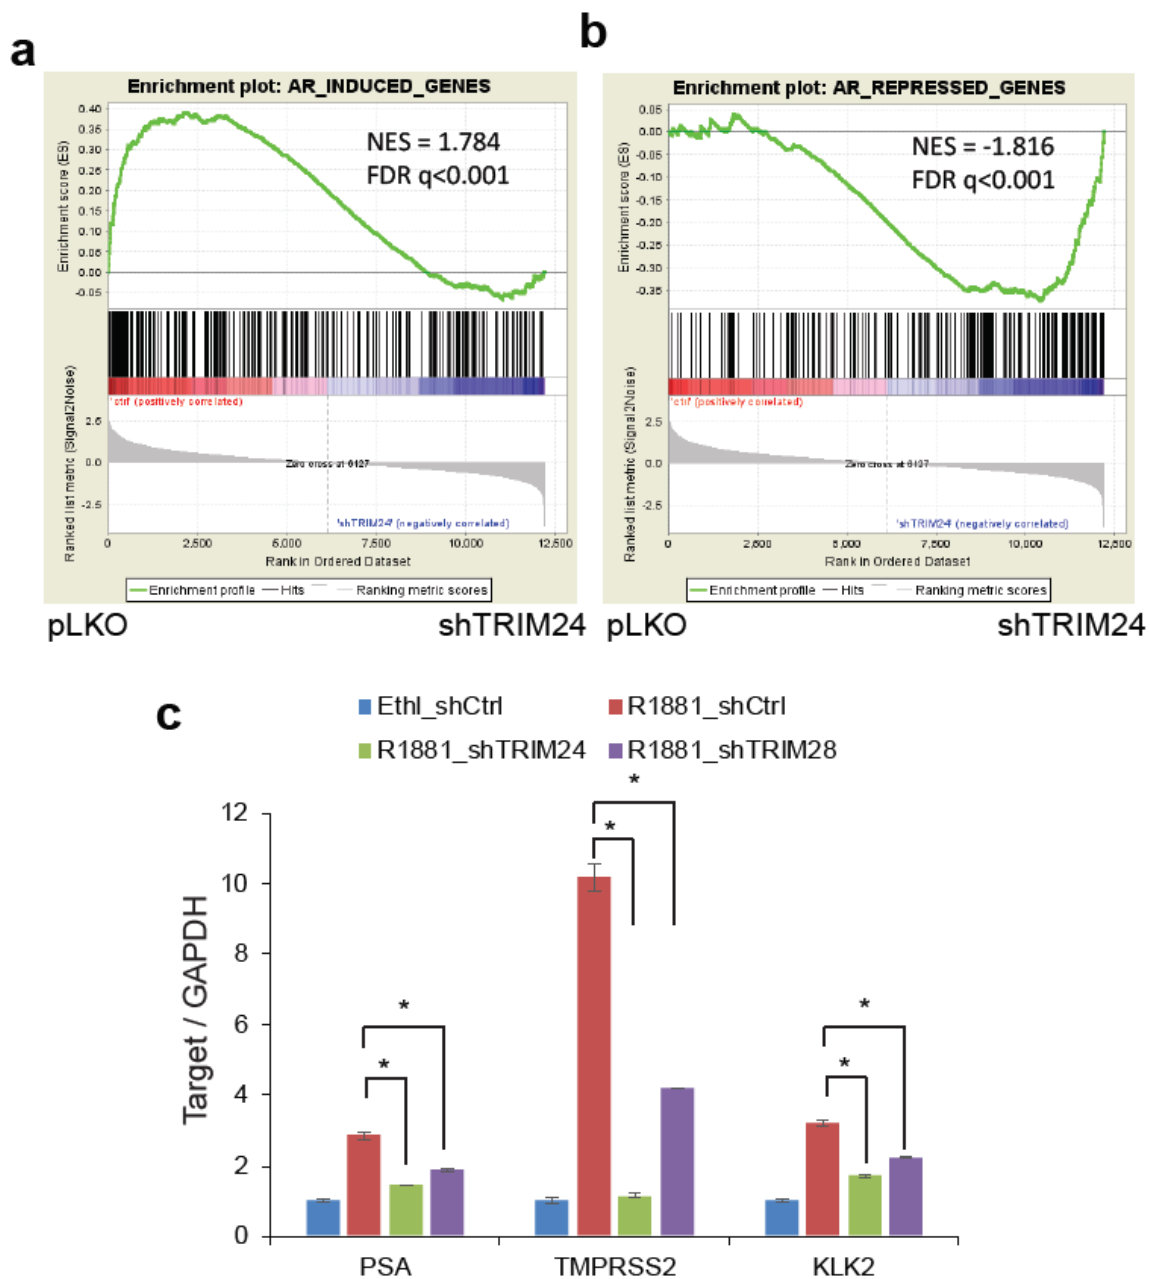

**Supplementary Figure 5 (related to Figure 5). TRIM24 positively regulates AR transcriptional program in prostate cancer cells.**

(a-b) GSEA was performed to determine the enrichment of AR-induced (a) or -repressed gene sets (b) in gene expression dataset profiling control and TRIM24-knockdown in androgen-stimulated LNCaP cells.

(c) TRIM28 regulates androgen signaling CRPC. C4-2B cells infected with pLKO, shTRIM24 and shTRIM28 were hormone-starved for 3 days, treated with 1nM R1881 for 24 hours, and subjected to qRT-PCR analysis. Data shown is mean ( $\pm$ SEM,  $n=3$ ). \* $P < 0.05$  by Student's t-test.

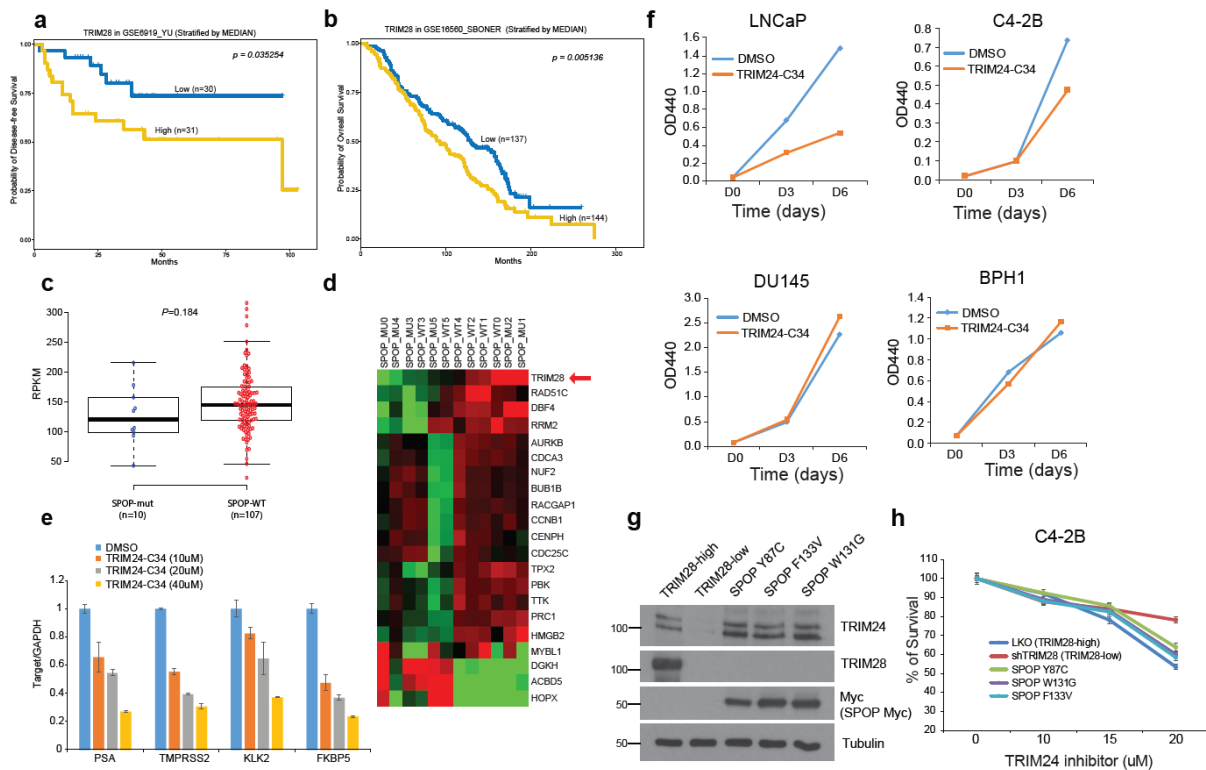

**Supplementary Figure 6 (related to Figure 6). High TRIM28 level predicts poor clinical outcome and can be targeted using TRIM24 inhibitor TRIM24-C34.**

**(a-b)** High TRIM28 level is associated with poor clinical outcome of primary PCa. Kaplan-Meier analysis of PCa outcome using the GSE6919 and GSE16560 PCa dataset. Localized PCa cases were stratified based on their TRIM28 expression level and analyzed for biochemical recurrence **(a)** and overall survival **(b)**. The p values for Kaplan-Meier curves were determined using a log-rank test.

**(c)** TRIM28 expression in SPOP-WT and -Mutant tumors in metastatic CRPC. Boxplot depicts TRIM28 expression in SPOP-WT or -Mutant tumor from SU2C2 RNA-seq dataset. Elements in boxplot: Upper whisker= max value excluding outliers, upper bound of the box=3<sup>rd</sup> quartile, central line=median, lower bound of the box=1<sup>st</sup> quartile, lower whisker=least value excluding outliers. Statistical difference was assessed by Student's T-test.

**(d)** TRIM28 expression correlates to TRIM24-AR coactivated genes in mouse organoid. TRIM28 and TRIM24-AR co-activated gene expression were obtained from RNA-seq dataset of 6 SPOP-WT and -Mutant expressing mouse organoids (Blattner et al., 2017). Heatmap depicts clustered TRIM28 and TRIM24/AR coactivated gene expression.

**(e)** Compound TRIM24-C34 represses androgen signaling. LNCaP cells were treated with increasing doses (0, 10, 20, 40 μM) of TRIM24-C34 for 4 days and mRNA was then extracted and subjected to qPCR analysis using corresponding primer sets and normalized to GAPDH. Data shown is mean (±SEM, n=3).

**(f)** TRIM24-C34 inhibits cell growth in AR-positive but not AR-negative prostate cancer cell lines. BPH1, DU145, LNCaP and C4-2B were cultured in the presence of 10 μM compound. WST1 assay was performed at day 0, 3 and 6 to evaluate the cell proliferation.



**(g-h)** CRPC with SPOP mutation or TRIM28 elevation exhibits sensitivity to TRIM24 inhibitors. Expression of Myc-SPOP-Y87C/F133V/W131G and various proteins were confirmed by western blotting **(g)**. These cells were then treated with increasing doses of TRIM24-bromodomain inhibitor (TRIM24-C34) for 14 days and measured for cell survival in colony formation assays **(h)**.

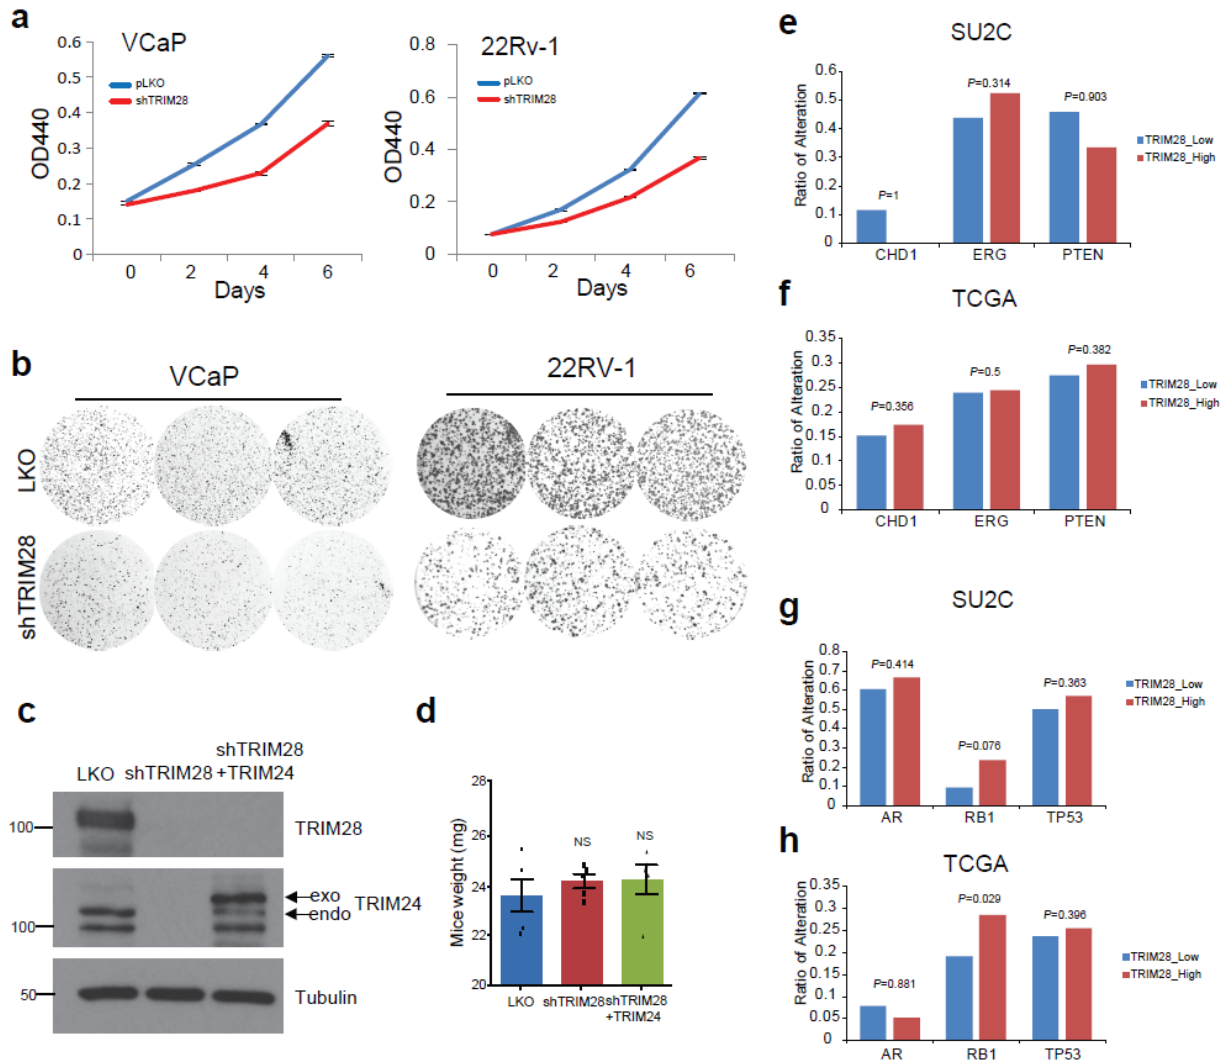

**Supplementary Figure 7 (related to Figure 7). TRIM28 promotes prostate cancer growth.**

**(a-b)** Proliferation of control or TRIM28-knockdown VCaP and 22Rv-1 cells were evaluated by WST-1 assay **(a)** and colony formation assay **(b)**.

**(c)** Protein lysates from C4-2B was subjected to western blotting analysis.

**(d)** Mice weight was plotted as a bar graph. Data shown is mean ( $\pm$ SEM,  $n=5$ ). NS: not significant.

**(e-f)** TRIM28 overexpressing is not accompanied with CHD1, ERG and PTEN alteration. Tumors of TRIM28-High (ranked top 20% in TRIM28 expression) or -Low (remaining 80%) from SU2C RNA-seq dataset **(e)** or TCGA dataset **(f)** were examined for CHD1, ERG and PTEN alteration. The probability of genomic alteration was plotted as bar graph, and Statistical difference was assessed by Student's T-test.

**(g-h)** TRIM28 overexpressing is associated with RB1 loss. The probabilities of genomic alteration of AR, RB1 and TP53 in TRIM28-High or -Low tumors from SU2C RNA-seq dataset **(g)** or TCGA dataset **(h)** were plotted as bar graph, and Statistical difference was assessed by Student's T-test.

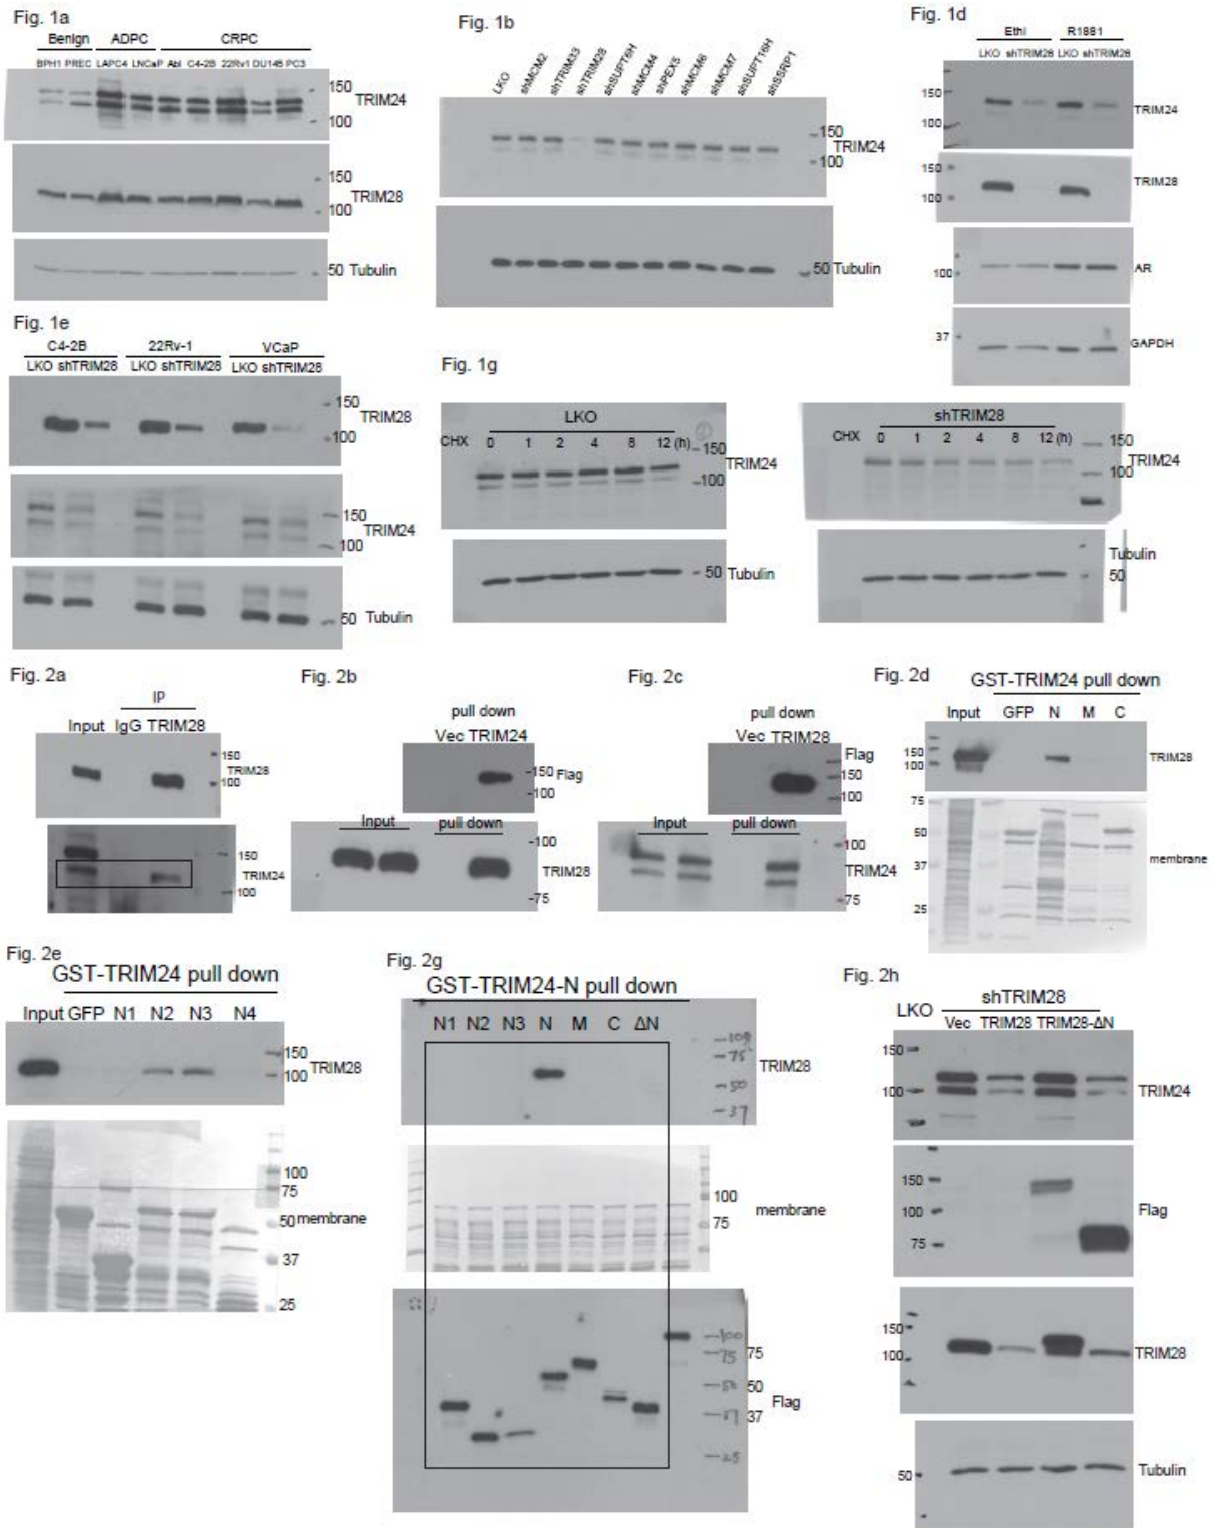

Supplementary Figure 8. Unprocessed blot images for the western results in Figure 1-2.

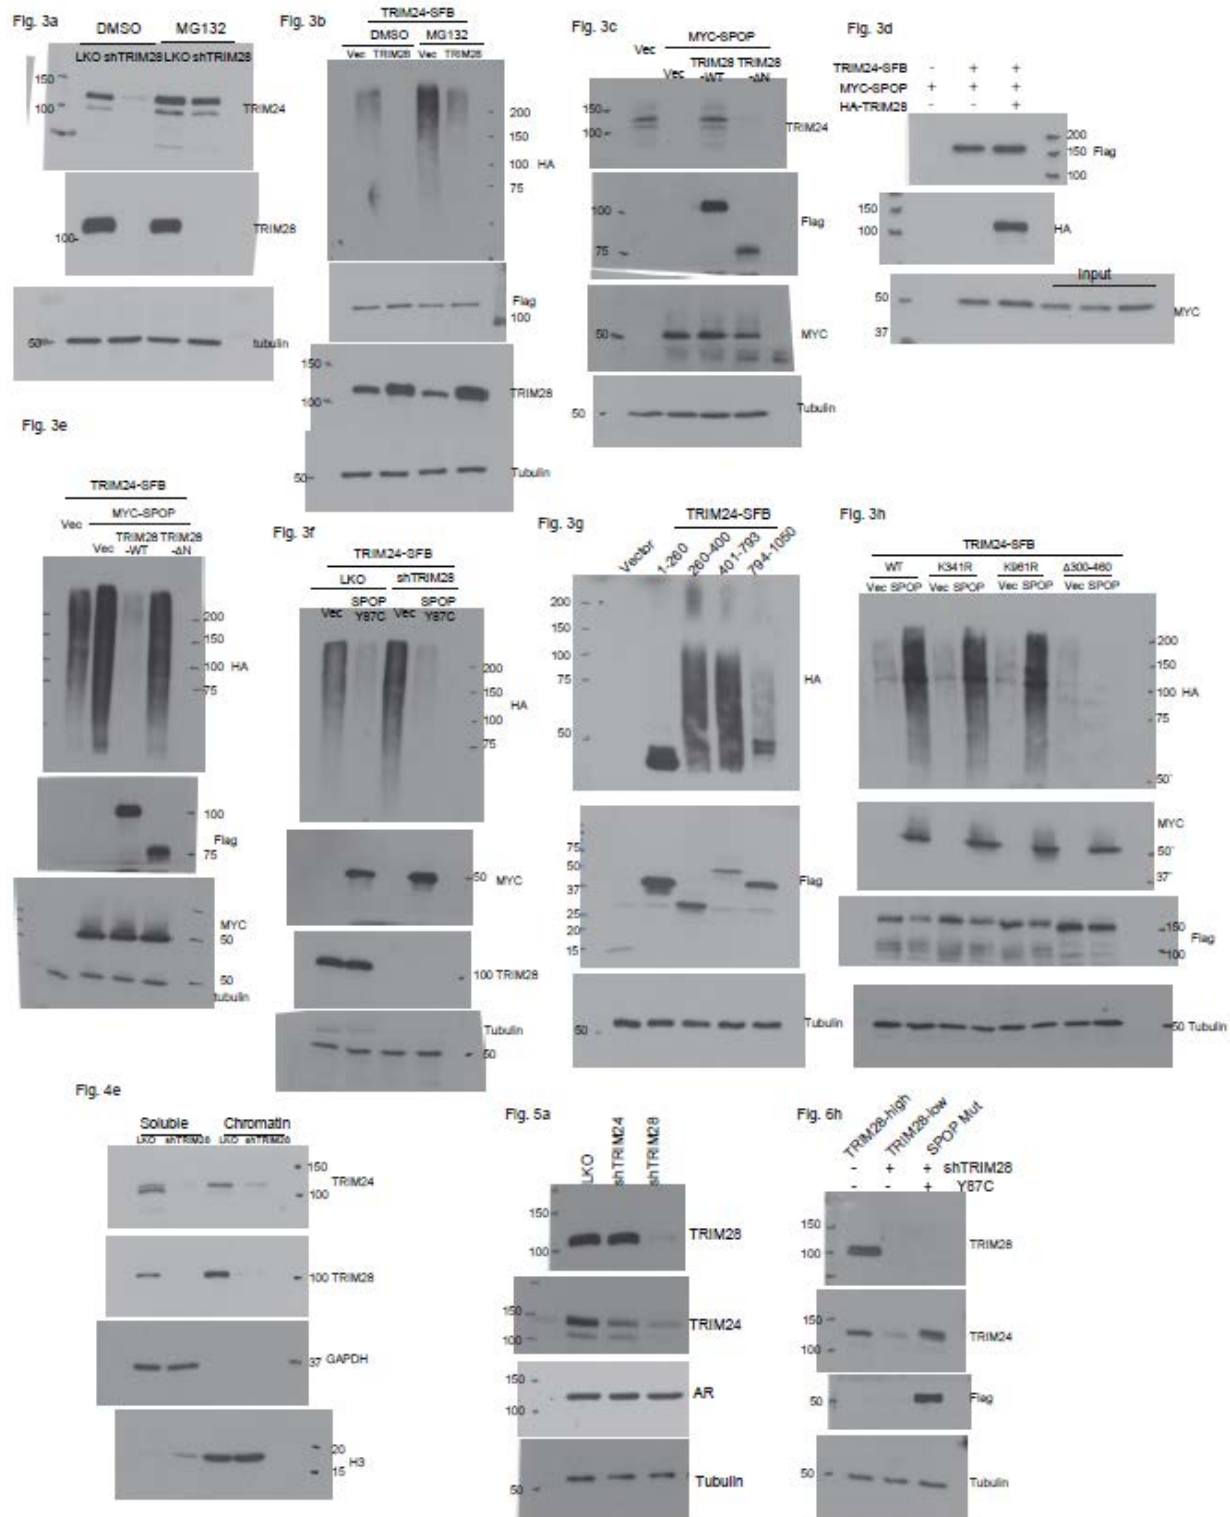

Supplementary Figure 9. Unprocessed blot images for the western results in Figure 3-6

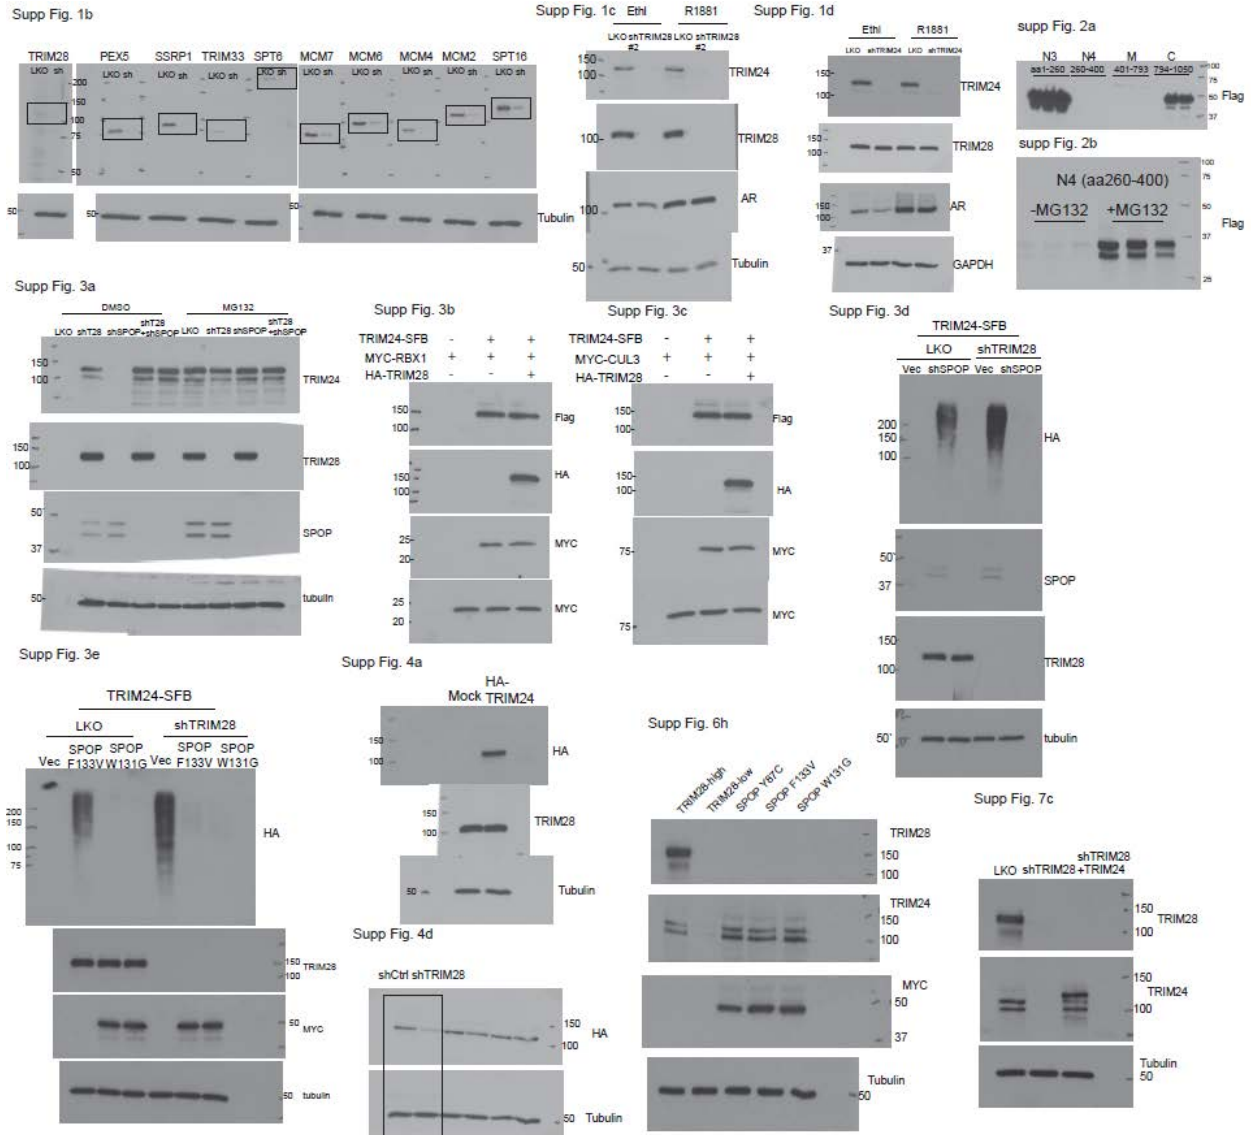

**Supplementary Figure 10. Unprocessed blot images for the western results in supplementary figures**

**Supplementary Table 1: Top TRIM24 interactors**

| Protein Name | Unique peptide | Total peptide | Mw     |
|--------------|----------------|---------------|--------|
| TRIM24       | 76             | 843           | 116.76 |
| MCM2         | 29             | 42            | 101.83 |
| TRIM33       | 28             | 41            | 122.46 |
| TRIM28       | 20             | 29            | 88.49  |
| SUPT6H       | 20             | 23            | 198.95 |
| MCM4         | 19             | 28            | 96.5   |
| PEX5         | 18             | 20            | 70.82  |
| MCM6         | 15             | 16            | 92.83  |
| MCM7         | 13             | 14            | 81.26  |
| SUPT16H      | 11             | 11            | 119.84 |
| SSRP1        | 11             | 11            | 81.02  |
| SPOP         | 4              | 4             | 42.1   |



**Supplementary Table 3: Oligonucleotides that were utilized in this study**

| Name           | Sequence                    | Application |
|----------------|-----------------------------|-------------|
| TRIM24 F       | TGTGAAGGACACTACTGAGGTT      | qRT-PCR     |
| TRIM24 R       | GCTCTGATACACGTCTTGCAG       | qRT-PCR     |
| GAPDH F1       | TGCACCACCAACTGCTTAGC        | qRT-PCR     |
| GAPDH R1       | GGCATGGACTGTGGTCATGAG       | qRT-PCR     |
| PSA F1         | ACGCTGGACAGGGGGCAAAG        | qRT-PCR     |
| PSA R1         | GGGCAGGGCACATGGTTCCT        | qRT-PCR     |
| KLK2 F1        | CCATGCCTGGAGACATATCA        | qRT-PCR     |
| KLK2 R1        | TCCAGCACATGTCACTCTCC        | qRT-PCR     |
| TMPRSS2 F1     | CAGGAGTGTACGGGAATGTGATGGT   | qRT-PCR     |
| TMRPSS2 R1     | GATTAGCCGTCTGCCCTCATTTGT    | qRT-PCR     |
| AURKB F1       | TTTGCTATGAGCTGCTGGTG        | qRT-PCR     |
| AURKB R1       | CACAGAAGCGGGGAACCTTA        | qRT-PCR     |
| PBK F1         | CCAAACATTGTTGGTTATCGTGC     | qRT-PCR     |
| PBK R1         | GGCTGGCTTTATATCGTTCTTCT     | qRT-PCR     |
| TPX2 F1        | ATGGAAGTGGAGGGCTTTTTC       | qRT-PCR     |
| TPX2 F2        | TGTTGTCAACTGGTTTCAAAGGT     | qRT-PCR     |
| KIAA0066 pF1   | CTAGGAGGGTGGAGGTAGGG        | ChIP-PCR    |
| KIAA0066 pR1   | GCCCCAACAGGAGTAATGA         | ChIP-PCR    |
| PSA pF1        | GCCTGGATCTGAGAGAGATATCATC   | ChIP-PCR    |
| PSA pR1        | ACACCTTTTTTTTTCTGGATTGTTG   | ChIP-PCR    |
| KLK2 pF1       | AGCATCTAGGTGCCAACAGG        | ChIP-PCR    |
| KLK2 pR1       | GACAAGGCGATGGAGAGAAC        | ChIP-PCR    |
| TMPRSS2 pF1    | GGTAAACTCTCCCTGCCACA        | ChIP-PCR    |
| TMPRSS2 pR1    | TACTCCAGGAAGTGGGGATG        | ChIP-PCR    |
| AURKB pF1      | CGGCGGTTTTGTTATTGG          | ChIP-PCR    |
| AURKB pR1      | CTCGGCCTCTGTGTTTCGAT        | ChIP-PCR    |
| PBK pF1        | AGCTGCCTCTAGCACCAACAC       | ChIP-PCR    |
| PBK pR1        | CAGGAGGGTTCGAATTGCAA        | ChIP-PCR    |
| TPX2 pF1       | GGCTTCTCGAGCTCACTAGG        | ChIP-PCR    |
| TPX2 pR1       | CCCTCCTCTCAGGAAGGTCT        | ChIP-PCR    |
| TRIM24 1 FP    | ATGGAGGTGGCGGTGGAGAAG       | Cloning     |
| TRIM24 1050 RP | TTTAAGCAACTGGCGTTCTTC       | Cloning     |
| TRIM28 1 FP    | ATGGCGGCTCCGCGGCGGCAGCC     | Cloning     |
| TRIM28 835R    | GGGGCCATCACCAGGGCCACCAG     | Cloning     |
| TRIM28 250 RP  | CCTCACTGCATCCTCTAAGAAGT     | Cloning     |
| TRIM28 400 RP  | CTTGGTCCAGGCATTGAGGTCCCA    | Cloning     |
| TRIM28 380 FP  | ATGGTGGATCCCGTGGAGCCACATGGC | Cloning     |
| TRIM28 628 RP  | GCAAATGGTGGCACTGTCATCCAG    | Cloning     |
| TRIM28 602 FP  | ATGGGGCTGGAGGTGGTGGCTCCTGAG | Cloning     |
| TRIM28 250 FP  | ATGTTAGAGGATGCAGTGAGGAACCAG | Cloning     |
| TRIM28 150 RP  | GTTCGCATCCTGGGCGTCCGGT      | Cloning     |



|                             |                                                                                       |         |
|-----------------------------|---------------------------------------------------------------------------------------|---------|
| TRIM24 RP HA                | TCAAGCGTAATCTGGAACATCGTATGGGTAAGC<br>GTAATCTGGAACATCGTATGGGTA<br>TTAAGCAACTGGCGTTCTTC | Cloning |
| TRIM24 F1F<br>BamH1         | GCG GGATCC ATGGAGGTGGCGGTGGAGAAG                                                      | Cloning |
| TRIM24 F1R NOT1             | AGCT GCGGCCGC<br>GGTCACTGGGGATGCATCACA                                                | Cloning |
| TRIM24 F2F<br>BamH1         | GCG GGATCC ATG<br>AACAAACACCATCCAATTTCACTG                                            | Cloning |
| TRIM24 F2R NOT1             | AGCT GCGGCCGC<br>GTGAAGTCCAGGTTGATCTCC                                                | Cloning |
| TRIM24 F3F SalI             | GCG GTCGACAG ATG<br>CAGGACAATTCCTCAAATGGA                                             | Cloning |
| TRIM24 F3R NOT1             | AGCT GCGGCCGC TTTAAGCAACTGGCGTTCTTC                                                   | Cloning |
| TRIM24 100R<br>NOT1         | AGCT GCGGCCGC<br>CTCGGCCGAGCCCAGCATGGG                                                | Cloning |
| TRIM24 100F<br>BamH1        | GCG GGATCC ATG<br>GAGACCCCGCCACCCGTCCT                                                | Cloning |
| TRIM24 260R<br>NOT1         | AGCT GCGGCCGC TTCTATAAATTGGTATCTATG                                                   | Cloning |
| TRIM24 260F<br>BamH1        | GCG GGATCC ATG ATG<br>GAAGAAGCTTTTCAGAATCAG                                           | Cloning |
| SPOP CF                     | ATGTCAAGGGTTCCAAGTCCT                                                                 | Cloning |
| SPOP CR                     | GGATTGCTTCAGGCGTTTGCG                                                                 | Cloning |
| SPOP Y87C FP                | AGCAAAGATTACCTGTCACTTTGCCTGTTACTG<br>GTCAGCTGTCCA                                     | Cloning |
| SPOP Y87C RP                | TGGACAGCTGACCAGTAACAGGCAAAGTGACA<br>GGTAATCTTTGCT                                     | Cloning |
| SPOP F133V FP               | GGTTTGTGCAAGGCAAAGACGGGGGATTCAAG<br>AAATTCATCCGT                                      | Cloning |
| SPOP F133V RP               | ACGGATGAATTTCTTGAATCCCCGTCCTTGCCT<br>TGCACAAACC                                       | Cloning |
| SPOP W131G FP               | GCAAGGCAAAGACTGGGGAGTCAAGAAATTCA<br>TCCGTAGAGATT                                      | Cloning |
| SPOP W131G RP               | AATCTCTACGGATGAATTTCTTGACTCCCCAGTC<br>TTGCCTTGC                                       | Cloning |
| TRIM24 K341R FP             | CTTGCAAAGGACCATCGCATGAGACTTATGCAA<br>CAACAACAGGAA                                     | Cloning |
| TRIM24 K341R RP             | TTCCTGTTGTTGTTGCATAAGTCTCATGCGATGG<br>TCCTTTGCAAG                                     | Cloning |
| TRIM24 K961R FP             | GAAGATTATTCATGTACTCAAGACCTGAAGAT<br>TTGTAGCTGAT                                       | Cloning |
| TRIM24 K961R RP             | ATCAGCTACAAAATCTTCAGGTCTTGAGTACAT<br>GGAATAATCTTC                                     | Cloning |
| TRIM24 del 300-<br>460aa FP | AACAGAATTATTGAAGTAAATCAAACACAGATC<br>AGCCTAGCTCAATTA                                  | Cloning |

|                         |                                                     |         |
|-------------------------|-----------------------------------------------------|---------|
| TRIM24 del 300-460aa RP | TAATTGAGCTAGGCTGATCTGTGTTTGATTACT<br>TCAATAATTCTGTT | Cloning |
|-------------------------|-----------------------------------------------------|---------|

**Supplemental Table 4: shRNA used in this study**

| <b>Target</b> | <b>Supplier</b> | <b>Catalog number</b> |
|---------------|-----------------|-----------------------|
| TRIM28-1      | sigma           | TRCN0000199141        |
| TRIM28-2      | sigma           | TRCN0000017998        |
| TRIM24        | sigma           | TRCN0000021260        |
| MCM2          | sigma           | TRCN0000278310        |
| TRIM33        | sigma           | TRCN0000322655        |
| SUPT6H        | sigma           | TRCN0000019732        |
| MCM4          | sigma           | TRCN0000074244        |
| shSUPT16H     | sigma           | TRCN0000293350        |
| shSSRP1       | sigma           | TRCN0000343894        |
| shPEX5        | sigma           | TRCN0000330702        |
| shMCM6        | sigma           | TRCN0000275649        |
| shMCM7        | sigma           | TRCN0000330416        |
| shSPOP        | Sigma           | TRCN0000139181        |
|               |                 |                       |
|               |                 |                       |
